# Supplementary material
Source: PubMed Central journal article supplement (PMC2689048)
Supplement: blood-2009-02-204800_1.pdf [file blood-2009-02-204800_1.pdf]

| Locus      | CD34+<br>Blood cells |      | CD34 iPS1 |      | CD34 iPS2 |      |
|------------|----------------------|------|-----------|------|-----------|------|
|            | X                    | Y    | X         | Y    | X         | Y    |
| Amelogenin | X                    | Y    | X         | Y    | X         | Y    |
| vWA        | 17                   | 18   | 17        | 18   | 17        | 18   |
| D8S1179    | 12                   | 13   | 12        | 13   | 12        | 13   |
| TPOX       | 9                    | 11   | 9         | 11   | 9         | 11   |
| FGA        | 22                   | 23.2 | 22        | 23.2 | 22        | 23.2 |
| D3S1358    | 14                   | 16   | 14        | 16   | 14        | 16   |
| THO1       | 7                    | 9.3  | 7         | 9.3  | 7         | 9.3  |
| D21S11     | 30                   | 32.2 | 30        | 32.2 | 30        | 32.2 |
| D18S51     | 14                   | 18   | 14        | 18   | 14        | 18   |
| Penta E    | 13                   | 14   | 13        | 14   | 13        | 14   |
| D5S818     | 10                   | 12   | 10        | 12   | 10        | 12   |
| D13S317    | 10                   | 11   | 10        | 11   | 10        | 11   |
| D7S820     | 8                    | 9    | 8         | 9    | 8         | 9    |
| D16S539    | 11                   | 12   | 11        | 12   | 11        | 12   |
| CSF1PO     | 10                   | 13   | 10        | 13   | 10        | 13   |
| Penta D    | 9                    | 13   | 9         | 13   | 9         | 13   |
